# Supplementary material
Source: HighWire-hosted journal article supplement (http://bmjopenquality.bmj.com/highwire/filestream/147018/field_highwire_adjunct_files/0/bmjoq-2023-002522supp001_data_supplement.pdf)
Supplement: bmjoq-2023-002522supp001_data_supplement.pdf [file bmjoq-2023-002522supp001_data_supplement.pdf]

## Appendix I. Quality Improvement and Decision-Maker Search Strategy

MEDLINE (OVID)

| #  | Query                                                                                                                                                                                                                                                                                                                                                                                                                                                          | Results from April 4, 2022 |
|----|----------------------------------------------------------------------------------------------------------------------------------------------------------------------------------------------------------------------------------------------------------------------------------------------------------------------------------------------------------------------------------------------------------------------------------------------------------------|----------------------------|
| 1  | "Quality improvement"/                                                                                                                                                                                                                                                                                                                                                                                                                                         | 30,574                     |
| 2  | (Quality adj3 improv*).tw.                                                                                                                                                                                                                                                                                                                                                                                                                                     | 183,201                    |
| 3  | (pdsa or plan-do-study-act or "plan dostudyact" or pdca or plan-do-check-act or "plan do check act" or define-measure-analyze-improve control or dmaic or dmadv or define-measure-analyze-design-verify).tw.                                                                                                                                                                                                                                                   | 2,421                      |
| 4  | ((lean adj manufacturing) or (lean adj production) or (lean adj healthcare) or (lean adj health adj care) or (lean adj health adj service) or (lean adj healthcare adj service) or (lean adj health adj care adj service) or (inventive adj problem adj solving) or (inventive adj problem-solving) or (inventive adj problem solving) or (business adj process adj reengineering) or (business adj process adj re-engineering) or (system* adj redesign)).tw. | 604                        |
| 5  | ((iterative adj cycle) or (rapid adj cycle) or (small adj test adj2 change)).tw.                                                                                                                                                                                                                                                                                                                                                                               | 655                        |
| 6  | (deming or taguchi or kansei or kaizen or (toyota adj production adj system)).tw.                                                                                                                                                                                                                                                                                                                                                                              | 2,177                      |
| 7  | (six-sigma or (six adj sigma) or "total quality management" or (quality adj function adj deployment) or (quality adj circle) or (quality adj cycle)).tw.                                                                                                                                                                                                                                                                                                       | 1,953                      |
| 8  | (policy-maker* or policymaker* or decisionmaker* or decision-maker*).tw.                                                                                                                                                                                                                                                                                                                                                                                       | 61,920                     |
| 9  | (administrator* or manager*).tw.                                                                                                                                                                                                                                                                                                                                                                                                                               | 81,017                     |
| 10 | 1 or 2                                                                                                                                                                                                                                                                                                                                                                                                                                                         | 198,463                    |
| 11 | 3 or 4 or 5 or 6 or 7                                                                                                                                                                                                                                                                                                                                                                                                                                          | 7,514                      |
| 12 | 10 or 11                                                                                                                                                                                                                                                                                                                                                                                                                                                       | 203,451                    |
| 13 | 8 or 9                                                                                                                                                                                                                                                                                                                                                                                                                                                         | 137,897                    |
| 14 | 12 and 13                                                                                                                                                                                                                                                                                                                                                                                                                                                      | 7,218                      |
| 15 | limit 14 to yr="2002 -Current"                                                                                                                                                                                                                                                                                                                                                                                                                                 | 6,319                      |
| 16 | limit 15 to (english or french)                                                                                                                                                                                                                                                                                                                                                                                                                                | 6,145                      |

## CINAHL (EBSCO)

| #   | Query                                                                                                                                                                                                                                                                                                                                                                                                                                                                                                                                                                                                                                                                                                                                                                                                                                                                                                                                                                                                                                                                                                                            | Results from April 4, 2022 |
|-----|----------------------------------------------------------------------------------------------------------------------------------------------------------------------------------------------------------------------------------------------------------------------------------------------------------------------------------------------------------------------------------------------------------------------------------------------------------------------------------------------------------------------------------------------------------------------------------------------------------------------------------------------------------------------------------------------------------------------------------------------------------------------------------------------------------------------------------------------------------------------------------------------------------------------------------------------------------------------------------------------------------------------------------------------------------------------------------------------------------------------------------|----------------------------|
| S17 | S12 AND S13 (English or French) AND 2002-2022, Exclude MEDLINE                                                                                                                                                                                                                                                                                                                                                                                                                                                                                                                                                                                                                                                                                                                                                                                                                                                                                                                                                                                                                                                                   | 1,654                      |
| S16 | S12 AND S13 (English or French) AND 2002-2022                                                                                                                                                                                                                                                                                                                                                                                                                                                                                                                                                                                                                                                                                                                                                                                                                                                                                                                                                                                                                                                                                    | 2,813                      |
| S15 | S12 AND S13 (English or French)                                                                                                                                                                                                                                                                                                                                                                                                                                                                                                                                                                                                                                                                                                                                                                                                                                                                                                                                                                                                                                                                                                  | 3,068                      |
| S14 | S12 AND S13                                                                                                                                                                                                                                                                                                                                                                                                                                                                                                                                                                                                                                                                                                                                                                                                                                                                                                                                                                                                                                                                                                                      | 3,121                      |
| S13 | S8 OR S9                                                                                                                                                                                                                                                                                                                                                                                                                                                                                                                                                                                                                                                                                                                                                                                                                                                                                                                                                                                                                                                                                                                         | 82,864                     |
| S12 | S10 OR S11                                                                                                                                                                                                                                                                                                                                                                                                                                                                                                                                                                                                                                                                                                                                                                                                                                                                                                                                                                                                                                                                                                                       | 72,878                     |
| S11 | S3 OR S4 OR S5 OR S6 OR S7                                                                                                                                                                                                                                                                                                                                                                                                                                                                                                                                                                                                                                                                                                                                                                                                                                                                                                                                                                                                                                                                                                       | 3,905                      |
| S10 | S1 OR S2                                                                                                                                                                                                                                                                                                                                                                                                                                                                                                                                                                                                                                                                                                                                                                                                                                                                                                                                                                                                                                                                                                                         | 70,964                     |
| S9  | (TI administrator* OR AB administrator*) OR (TI manager* OR AB manager*)                                                                                                                                                                                                                                                                                                                                                                                                                                                                                                                                                                                                                                                                                                                                                                                                                                                                                                                                                                                                                                                         | 56,724                     |
| S8  | (TI policy-maker* OR AB policy-maker*) OR (TI policymaker* OR AB policymaker*) OR (TI decisionmaker* OR AB decisionmaker*) OR (TI decision-maker* OR AB decision-maker*)                                                                                                                                                                                                                                                                                                                                                                                                                                                                                                                                                                                                                                                                                                                                                                                                                                                                                                                                                         | 28,735                     |
| S7  | ((TI six-sigma OR AB six-sigma) OR ((TI six OR AB six) W1 (TI sigma OR AB sigma)) OR ((TI "total quality management" OR AB "total quality management")) OR ((TI quality OR AB quality) W1 (TI function OR AB function) W1 (TI deployment OR AB deployment)) OR ((TI quality OR AB quality) W1 (TI circle OR AB circle)) OR ((TI quality OR AB quality) W1 (TI cycle OR AB cycle))                                                                                                                                                                                                                                                                                                                                                                                                                                                                                                                                                                                                                                                                                                                                                | 1,445                      |
| S6  | (TI deming OR AB deming) OR (TI taguchi OR AB taguchi) OR (TI kansei OR AB kansei) OR (TI kaizen OR AB kaizen) OR ((TI toyota OR AB toyota) W1 (TI production OR AB production) W1 (TI system OR AB system))                                                                                                                                                                                                                                                                                                                                                                                                                                                                                                                                                                                                                                                                                                                                                                                                                                                                                                                     | 406                        |
| S5  | ((TI iterative OR AB iterative) W1 (TI cycle OR AB cycle)) OR ((TI rapid OR AB rapid) W1 (TI cycle OR AB cycle)) OR ((TI small OR AB small) W1 (TI test OR AB test) N2 (TI change OR AB change))                                                                                                                                                                                                                                                                                                                                                                                                                                                                                                                                                                                                                                                                                                                                                                                                                                                                                                                                 | 451                        |
| S4  | ((TI lean OR AB lean) W1 (TI manufacturing OR AB manufacturing)) OR ((TI lean OR AB lean) W1 (TI production OR AB production)) OR ((TI lean OR AB lean) W1 (TI healthcare OR AB healthcare)) OR ((TI lean OR AB lean) W1 (TI health OR AB health) W1 (TI care OR AB care)) OR ((TI lean OR AB lean) W1 (TI health OR AB health) W1 (TI service OR AB service)) OR ((TI lean OR AB lean) W1 (TI healthcare OR AB healthcare) W1 (TI service OR AB service)) OR ((TI lean OR AB lean) W1 (TI health OR AB health) W1 (TI care OR AB care) W1 (TI service OR AB service)) OR ((TI inventive OR AB inventive) W1 (TI problem OR AB problem) W1 (TI solving OR AB solving)) OR ((TI inventive OR AB inventive) W1 (TI problem-solving OR AB problem-solving)) OR ((TI inventive OR AB inventive) W1 (TI problem solving OR AB problem solving)) OR ((TI business OR AB business) W1 (TI process OR AB process) W1 (TI reengineering OR AB reengineering)) OR ((TI business OR AB business) W1 (TI process OR AB process) W1 (TI re-engineering OR AB re-engineering)) OR ((TI system* OR AB system*) W1 (TI redesign OR AB redesign)) | 444                        |
| S3  | (TI pdsa OR AB pdsa) OR (TI plan-do-study-act OR AB plan-do-study-act) OR (TI "plan do study act" OR AB "plan do study act") OR (TI pdca OR AB pdca) OR (TI plan-do-check-act OR AB plan-do-check-act) OR (TI "plan do check act" OR AB "plan do check act") OR (TI define-measure-analyze-improve control OR AB define-measure-analyze-improve control) OR (TI dmaic OR AB dmaic) OR (TI dmadv OR AB dmadv) OR (TI define-measure-analyze-design-verify OR AB define-measure-analyze-design-verify)                                                                                                                                                                                                                                                                                                                                                                                                                                                                                                                                                                                                                             | 1,376                      |
| S2  | Quality N3 (TI improv* OR AB improv*)                                                                                                                                                                                                                                                                                                                                                                                                                                                                                                                                                                                                                                                                                                                                                                                                                                                                                                                                                                                                                                                                                            | 17,187                     |
| S1  | (MH "Quality improvement")                                                                                                                                                                                                                                                                                                                                                                                                                                                                                                                                                                                                                                                                                                                                                                                                                                                                                                                                                                                                                                                                                                       | 62,473                     |

## EMBASE (OVID)

| #  | Query                                                                                                                                                                                                                                                                                                                                                                                                                                                          | Results from April 4, 2022 |
|----|----------------------------------------------------------------------------------------------------------------------------------------------------------------------------------------------------------------------------------------------------------------------------------------------------------------------------------------------------------------------------------------------------------------------------------------------------------------|----------------------------|
| 1  | "Quality improvement"/                                                                                                                                                                                                                                                                                                                                                                                                                                         | 48,631                     |
| 2  | (Quality adj3 improv*).tw.                                                                                                                                                                                                                                                                                                                                                                                                                                     | 261,291                    |
| 3  | (pdca or plan-do-study-act or "plan do study act" or pdca or plan-do-check-act or "plan do check act" or define-measure-analyze-improve control or dmaic or dmadv or define-measure-analyze-design-verify).tw.                                                                                                                                                                                                                                                 | 5,846                      |
| 4  | ((lean adj manufacturing) or (lean adj production) or (lean adj healthcare) or (lean adj health adj care) or (lean adj health adj service) or (lean adj healthcare adj service) or (lean adj health adj care adj service) or (inventive adj problem adj solving) or (inventive adj problem-solving) or (inventive adj problem solving) or (business adj process adj reengineering) or (business adj process adj re-engineering) or (system* adj redesign)).tw. | 788                        |
| 5  | ((iterative adj cycle) or (rapid adj cycle) or (small adj test adj2 change)).tw.                                                                                                                                                                                                                                                                                                                                                                               | 936                        |
| 6  | (deming or taguchi or kansei or kaizen or (toyota adj production adj system)).tw.                                                                                                                                                                                                                                                                                                                                                                              | 3,149                      |
| 7  | (six-sigma or (six adj sigma) or "total quality management" or (quality adj function adj deployment) or (quality adj circle) or (quality adj cycle)).tw.                                                                                                                                                                                                                                                                                                       | 2,437                      |
| 8  | (policy-maker* or policymaker* or decisionmaker* or decision-maker*).tw.                                                                                                                                                                                                                                                                                                                                                                                       | 68,414                     |
| 9  | (administrator* or manager*).tw.                                                                                                                                                                                                                                                                                                                                                                                                                               | 82,217                     |
| 10 | 1 or 2                                                                                                                                                                                                                                                                                                                                                                                                                                                         | 280,240                    |
| 11 | 3 or 4 or 5 or 6 or 7                                                                                                                                                                                                                                                                                                                                                                                                                                          | 12,583                     |
| 12 | 10 or 11                                                                                                                                                                                                                                                                                                                                                                                                                                                       | 287,770                    |
| 13 | 8 or 9                                                                                                                                                                                                                                                                                                                                                                                                                                                         | 145,407                    |
| 14 | 12 and 13                                                                                                                                                                                                                                                                                                                                                                                                                                                      | 9,088                      |
| 15 | limit 14 to yr="2002 -Current"                                                                                                                                                                                                                                                                                                                                                                                                                                 | 8,431                      |
| 16 | limit 15 to (english or french)                                                                                                                                                                                                                                                                                                                                                                                                                                | 8,220                      |

## PSYCHINFO (OVID)

| #  | Query                                                                                                                                                                                                                                                                                                                                                                                                                                                             | Results from June 8 2023 |
|----|-------------------------------------------------------------------------------------------------------------------------------------------------------------------------------------------------------------------------------------------------------------------------------------------------------------------------------------------------------------------------------------------------------------------------------------------------------------------|--------------------------|
| 1  | "Quality improvement"/                                                                                                                                                                                                                                                                                                                                                                                                                                            | 0                        |
| 2  | (Quality adj3 improv*).ti,ab.                                                                                                                                                                                                                                                                                                                                                                                                                                     | 31,136                   |
| 3  | (pdca or plan-do-study-act or "plan dostudyact" or pdca or plan-do-check-act or "plan do check act" or define-measure-analyze-improve control or dmaic or dmadv or define-measure-analyze-design-verify).ti,ab.                                                                                                                                                                                                                                                   | 293                      |
| 4  | ((lean adj manufacturing) or (lean adj production) or (lean adj healthcare) or (lean adj health adj care) or (lean adj health adj service) or (lean adj healthcare adj service) or (lean adj health adj care adj service) or (inventive adj problem adj solving) or (inventive adj problem-solving) or (inventive adj problem solving) or (business adj process adj reengineering) or (business adj process adj re-engineering) or (system* adj redesign)).ti,ab. | 441                      |
| 5  | ((iterative adj cycle) or (rapid adj cycle) or (small adj test adj2 change)).ti,ab.                                                                                                                                                                                                                                                                                                                                                                               | 102                      |
| 6  | (deming or taguchi or kansei or kaizen or (toyota adj production adj system)).ti,ab.                                                                                                                                                                                                                                                                                                                                                                              | 318                      |
| 7  | (six-sigma or (six adj sigma) or "total quality management" or (quality adj function adj deployment) or (quality adj circle) or (quality adj cycle)).ti,ab.                                                                                                                                                                                                                                                                                                       | 935                      |
| 8  | (policy-maker* or policymaker* or decisionmaker* or decision-maker*).ti,ab.                                                                                                                                                                                                                                                                                                                                                                                       | 38,895                   |
| 9  | (administrator* or manager*).ti,ab.                                                                                                                                                                                                                                                                                                                                                                                                                               | 96,895                   |
| 10 | 1 or 2                                                                                                                                                                                                                                                                                                                                                                                                                                                            | 31,136                   |
| 11 | 3 or 4 or 5 or 6 or 7                                                                                                                                                                                                                                                                                                                                                                                                                                             | 1,973                    |
| 12 | 10 or 11                                                                                                                                                                                                                                                                                                                                                                                                                                                          | 32,729                   |
| 13 | 8 or 9                                                                                                                                                                                                                                                                                                                                                                                                                                                            | 131,306                  |
| 14 | 12 and 13                                                                                                                                                                                                                                                                                                                                                                                                                                                         | 2,511                    |
| 15 | limit 14 to yr="2002 -Current"                                                                                                                                                                                                                                                                                                                                                                                                                                    | 2,194                    |
| 16 | limit 15 to (english or french)                                                                                                                                                                                                                                                                                                                                                                                                                                   | 2,134                    |
